# Supplementary material
Source: HighWire-hosted journal article supplement (https://jnm.snmjournals.org/highwire/filestream/94473/field_highwire_adjunct_files/0/119545_Supplemental_Data.pdf)
Supplement: 119545_Supplemental_Data.pdf [file 119545_Supplemental_Data.pdf]

## Search Syntax

### Search strings:

#### *PubMed:*

((colorectal [tiab] OR rectal [tiab] OR colon [tiab] OR rectum [tiab] OR sigmoid [tiab] OR sigmoidal [tiab] OR rectosigmoid [tiab] OR rectosigmoidal [tiab] OR "large bowel" [tiab]) AND (liver [tiab] OR hepar [tiab] OR hepatic [tiab]) AND (metastasis [tiab] OR metastases [tiab] OR metastatic [tiab] OR disseminated [tiab] OR advanced [tiab])) AND ((yttrium [tiab] OR yttrium-90 [tiab] OR y90 [tiab] OR y-90 [tiab] OR 90yttrium [tiab] OR 90-yttrium [tiab] OR 90y [tiab] OR 90-y [tiab] OR "(90)yttrium" [tiab] OR "(90)-yttrium" [tiab] OR radioembolisation [tiab] OR radioembolization [tiab] OR "radio embolisation" [tiab] OR "radio embolization" [tiab] OR "radio-embolisation" [tiab] OR "radio-embolization" [tiab] OR "selective internal radiation therapy" [tiab] OR sirt [tiab] OR "internal radiation" [tiab] OR "intraarterial radiation" [tiab] OR "intra arterial radiation" [tiab]))

#### *EMBASE:*

((colorectal:ti,ab OR rectal:ti,ab OR colon:ti,ab OR rectum:ti,ab OR sigmoid:ti,ab OR sigmoidal:ti,ab OR rectosigmoid:ti,ab OR rectosigmoidal:ti,ab OR "large bowel":ti,ab) AND (liver:ti,ab OR hepar:ti,ab OR hepatic:ti,ab) AND (metastasis:ti,ab OR metastases:ti,ab OR metastatic:ti,ab OR disseminated:ti,ab OR advanced:ti,ab)) AND ((yttrium:ti,ab OR yttrium-90:ti,ab OR y90:ti,ab OR y-90:ti,ab OR 90yttrium:ti,ab OR 90-yttrium:ti,ab OR 90y:ti,ab OR 90-y:ti,ab OR "(90)yttrium":ti,ab OR "(90)-yttrium":ti,ab OR radioembolisation:ti,ab OR radioembolization:ti,ab OR "radio embolisation":ti,ab OR "radio embolization":ti,ab OR "radio-embolisation":ti,ab OR "radio-embolization":ti,ab OR "selective internal radiation therapy":ti,ab OR sirt:ti,ab OR "internal radiation":ti,ab OR "intraarterial radiation":ti,ab OR "intra arterial radiation":ti,ab))

#### *Cochrane Library:*

((colorectal OR rectal OR colon OR rectum OR sigmoid OR sigmoidal OR rectosigmoid OR rectosigmoidal OR "large bowel") AND (liver OR hepar OR hepatic) AND (metastasis OR metastases OR metastatic OR disseminated OR advanced)) AND ((yttrium OR yttrium-90 OR y90 OR y-90 OR 90yttrium OR 90-yttrium OR 90y OR 90-y OR "(90)yttrium" OR "(90)-yttrium" OR radioembolisation OR radioembolization OR "radio embolisation" OR "radio embolization" OR "radio-embolisation" OR "radio-embolization" OR "selective internal radiation therapy" OR sirt OR "internal radiation" OR "intraarterial radiation" OR "intra arterial radiation"))

Supplemental Table 1. Study characteristics for patient cohorts treated with Y90 radioembolization as monotherapy.

|                                      |                      | Study population |                   |                      |                                                                  |                   |                                                              |                                                                              |                                         |                                                                                 | Treatment        |                               | Outcome                                                  |                                     |                                           |                                  |
|--------------------------------------|----------------------|------------------|-------------------|----------------------|------------------------------------------------------------------|-------------------|--------------------------------------------------------------|------------------------------------------------------------------------------|-----------------------------------------|---------------------------------------------------------------------------------|------------------|-------------------------------|----------------------------------------------------------|-------------------------------------|-------------------------------------------|----------------------------------|
| Author                               | Study design         | No. of mCRC pts  | Total cohort size | Median age (range)   | Inclusion criterion for disease status                           | Patients with EHD | Performance score                                            | Hepatic function <sup>a</sup>                                                | Tumor burden                            | Previous systemic treatment lines                                               | Microsphere type | Delivered activity (GBq)      | Imaging interval - Time of response - Follow-up duration | Response (n) CR - PR - SD - PD - NE | Median progression-free survival (95%-CI) | Median overall survival (95%-CI) |
| Bester et al. <sup>2012</sup>        | Retrospective cohort | 224              | 339               | 67 (27-89)           | Minor intraabdominal lymphadenopathy, minor bone or lung lesions | 85/224 (38%)      | 85% had ECOG of 0                                            | NR                                                                           | Most pts had 0-25%                      | NS for mCRC                                                                     | Resin            | Median 1.8 (range 0.42-2.55)  | NA - NA - NA                                             | NR                                  | NR                                        | 11.9 months (10.1-14.9)          |
| Fahmueller et al. <sup>2012</sup>    | Prospective cohort   | 49               | 49                | 62.6 (35-77)         | Liver dominant (NS)                                              | NR                | NR                                                           | NR                                                                           | NR                                      | NR                                                                              | Resin            | NR                            | At 3 months - At 3 months - 3 months                     | 0 - 9 - 5 - 25 - 10                 | NR                                        | 8.8 months (5.1-18.1)            |
| Martin et al. <sup>2012</sup>        | Retrospective cohort | 24               | 24                | 63 (35-83)           | Liver dominant (NS)                                              | 13/24 (54%)       | NR                                                           | NR                                                                           | NR                                      | Median number of lines 3 (0-7)                                                  | NR               | NR                            | NR - NR - NR                                             | No objective responses              | 3.9 months (2.4-4.8)                      | 8.9 months (4.2-16.7)            |
| Tochetto et al. <sup>2012</sup>      | Retrospective cohort | 20               | 20                | Mean 65.1 (40-86)    | NR                                                               | NR                | NR                                                           | NR                                                                           | NR                                      | NR                                                                              | Glass            | NR                            | At 1 and 3 months - At 3 months - NR                     | n=6 CR or PR; n=14 SD or PD         | NR                                        | NR                               |
| Seidensticker et al. <sup>2012</sup> | Retrospective cohort | 29               | 229               | Mean 61.9 (SD 7.4)   | Only nonprogressive extrahepatic deposits                        | 14/29 (48%)       | NR                                                           | NR                                                                           | <25%: n=13<br>26-50%: n=15<br>>50%: n=0 | 2 lines: n=8 (28%)<br>3 lines: n=9 (31%)<br>>3 lines: n=12 (41%)                | Resin            | Median 1.76 (range 0.93-2.56) | At 6 weeks, then every 3 months - NR - NR                | 0 - 12 - 5 - 11 - 0                 | 5.5 months (95%-CI NR)                    | 8.3 months (95%-CI NR)           |
| Cosimelli et al. <sup>2010</sup>     | Phase 2 trial        | 50               | 50                | 67 (34-85)           | ≤ 3 nodules in the same organ each < 3 mm                        | 11/50 (22%)       | 0: n=35 (70%)<br>1: n=14 (28%)<br>2: n=0 (0%)<br>3: n=1 (2%) | Median bilirubin: 0.92 mg/100ml<br>Median ALT: 55 UI-1<br>Median AST 58 UI-1 | <25%: n=20<br>25-50%: n=30              | 3 lines: n=12 (24%)<br>4 lines: n=25 (50%)<br>5 lines: n=13 (26%)               | Resin            | Median 1.7 (range 0.9-2.2)    | Every 6 weeks - At 6 weeks - 11 months                   | 1 - 11 - 12 - 22 - 4 <sup>a</sup>   | 3.7 months (2.6-4.9)                      | 12.6 months (7.0-18.3)           |
| Cianni et al. <sup>2009</sup>        | Retrospective cohort | 41               | 41                | Mean 61.2 (range NR) | Liver dominant (NS)                                              | 4/41 (10%)        | Median 0.7                                                   | NR                                                                           | <25%: n=25<br>25-50%: n=6<br>>50%: n=10 | All pts had undergone >1 line, not further specified                            | Resin            | Mean 1.82                     | At 2 and 3 months - At 8 weeks - NR                      | 2 - 17 - 14 - 8 - 0                 | 279 days (= 9.2 months) (95%-CI NR)       | 11.6 months (95%-CI NR)          |
| Hong et al. <sup>2009</sup>          | Retrospective cohort | 15               | 15                | 62 (51-80)           | Liver dominant (NS)                                              | 5/15 (33%)        | NR                                                           | NR                                                                           | NR                                      | NR                                                                              | Glass            | NR                            | Every 4 to 6 weeks - NA - 5.7 months                     | NR                                  | NR                                        | 6.9 months (95%-CI NR)           |
| Mulcahy et al. <sup>2009</sup>       | Prospective cohort   | 72               | 72                | 61 (54-86)           | EHD not clinical important                                       | 29/72 (40%)       | 0: n=48 (67%)<br>1: n=16 (22%)<br>2: n=8 (11%)               | Elevated bilirubin: n=7<br>Elevated AST/ALT: n=27                            | <25%: n=58<br>25-50%: n=11<br>>50%: n=3 | 0 lines: n=4 (5%)<br>1 line: n=10 (14%)<br>2 lines: n=30 (42%)<br>3 lines: n=28 | Glass            | Median 2.37 (range 0.67-6.57) | At 1 month, then every 3 months - NR - NR                | 0 - 29 - 32 - 11 - 0                | TTP: 15.4 months (5.4-18)                 | 14.5 months (9.6-21.9)           |

|                                    |                      |     |     |                    |                            |             |                                                |                                                                    | (39%)                               |                                                                 |       |                               |                                      |                                    |                              |                                                       |
|------------------------------------|----------------------|-----|-----|--------------------|----------------------------|-------------|------------------------------------------------|--------------------------------------------------------------------|-------------------------------------|-----------------------------------------------------------------|-------|-------------------------------|--------------------------------------|------------------------------------|------------------------------|-------------------------------------------------------|
| Jakobs et al. <sup>2008</sup>      | Retrospective cohort | 41  | 41  | Mean 61 (37-77)    | Liver dominant (NS)        | 7/41 (17%)  | NR                                             | NR                                                                 | NR                                  | Mean number of regimes 2.8 (1-5)                                | Resin | Mean 1.9 (range 0.7-2.8)      | NR - NR - 7.9 months                 | 0 - 7 - 25 - 4 - 0                 | TTLP: 5.9 months (95%-CI NR) | 10.5 months (1.3-38.3)                                |
| Sato et al. <sup>2008</sup>        | Phase 2 trial        | 51  | 137 | Mean 63 (range NR) | EHD not clinical important | NR          | 0: n=34 (67%)<br>1: n=12 (23%)<br>2: n=5 (10%) | NR                                                                 | NR                                  | NS for mCRC                                                     | Glass | NS for mCRC                   | Every 3 months - NA - 5.2 months     | NS for mCRC                        | NR                           | 457 days (= 15.2 months) (95%-CI NR)                  |
| Kennedy et al. <sup>2006</sup>     | Retrospective cohort | 208 | 208 | 61.5 (30-94)       | Liver dominant (NS)        | NR          | NR                                             | NR                                                                 | NR                                  | 1 line: n=12 (6%)<br>2 lines: n=15 (7%)<br>3 lines: n=181 (87%) | Resin | Median 1.7 (range 0.4-2.9)    | NR - At 3 months - NR                | 0 - 74 - 114 - 21 - 0 <sup>c</sup> | NR                           | Resp: 10.5 months<br>Nonresp: 4.5 months (95%-CIs NR) |
| Lewandowski et al. <sup>2005</sup> | Phase 2 trial        | 27  | 27  | 68 (54-86)         | EHD not clinical important | 21/27 (78%) | 0: n=19 (70%)<br>1: n=7 (26%)<br>2: n=1 (4%)   | Elevated bilirubin: n=3<br>Elevated ALT: n=6<br>Elevated AST: n=13 | <25% n=21<br>25-50% n=5<br>>50% n=1 | 3 pts chemo naive                                               | Glass | Median 2.37 (range 0.67-6.57) | At 3 months - At 3 months - 3 months | 0 - 9 - 14 - 2 - 0 <sup>d</sup>    | NR                           | 283 days (218-406) (= 9.3 months)                     |

*In case of cohorts consisting only of part of patients with colorectal cancer liver metastases, data in this table are from those patients only. All studies included patients with unresectable and chemorefractory tumors.*

*mCRC colorectal cancer liver metastases; NR not reported; EHD extrahepatic disease; SD standard deviation; NS not specified; CI confidence interval*

*CR complete response; PR partial response; SD stable disease; PD progressive disease; NE not evaluable; TTLP time to liver progression*

*AST aspartate transaminase, ALT alanine transaminase.*

<sup>a</sup> *Two patients were lost to follow-up. Another two patients were excluded from the analysis due to excessive extrahepatic disease.*

<sup>b</sup> *Two patients were lost to follow-up. Two patients had not yet completed first follow-up and one patient died before first imaging follow-up.*

<sup>c</sup> *Patients numbers in publication do not add to exactly 208.*

<sup>d</sup> *Responses are represented per treated lobe, per patient response are not unequivocally extractable and numbers do not add to 26.*

<sup>e</sup> *Including bilirubin, AST, ALT, and albumin.*

Supplemental Table 2. Study characteristics for patient cohorts treated with Y90 radioembolization in combination with chemotherapy.

|                                      |                      | Study population |                   |                    |                                        |                                                      |                                                                  |                   |                                              |                               |                     |                                                                                  | Treatment        |                               | Outcome                                                  |                                                          |                                           |                                  |
|--------------------------------------|----------------------|------------------|-------------------|--------------------|----------------------------------------|------------------------------------------------------|------------------------------------------------------------------|-------------------|----------------------------------------------|-------------------------------|---------------------|----------------------------------------------------------------------------------|------------------|-------------------------------|----------------------------------------------------------|----------------------------------------------------------|-------------------------------------------|----------------------------------|
| Author                               | Study design         | No. of mCRC pts  | Total cohort size | Median age (range) | Concomitant chemotherapy               | Clinical setting                                     | Inclusion criterion disease status                               | Patients with EHD | Performance score                            | Hepatic function <sup>a</sup> | Tumor burden        | Previous systemic treatment lines                                                | Microsphere type | Delivered activity (GBq)      | Imaging interval - Time of response - Follow-up duration | Response (n) CR - PR - SD - PD - NE                      | Median progression-free survival (95%-CI) | Median overall survival (95%-CI) |
| Nace et al. <sup>2011</sup>          | Retrospective cohort | 51               | 51                | 64 (37-83)         | Intra hepatic floxuridine in 17/51 pts | Unresectable, chemorefractory                        | Tumor burden outside liver <10% of liver burden                  | 28/51 (58%)       | NR                                           | Normal bilirubin: n=47        | NR                  | capecitabine: n=14<br>becav/cetux: n=33                                          | Resin            | Median 0.89 (range 0.16-2.20) | Every 3 months - Between 30-180 days - 30-180 days       | 0 - 4 - 20 - 7 - 0                                       | NR                                        | 10.2 months (7.5-13.0)           |
| Zerizer et al. <sup>2012</sup>       | Retrospective cohort | 25               | 25                | 58.5 (30-78)       | FOLFOX in 5/25 pts                     | Unresectable                                         | Max one lung or one bone metastasis amenable for local treatment | 3/25 (12%)        | NR                                           | NR                            | NR                  | All pts received prior chemotherapy                                              | Resin            | Mean 2.2 (0.8-2.3)            | At 6 to 8 weeks - 6 to 8 weeks - NR                      | 0 - 2 - 23 - 0 - 0                                       | 9 months (95%-CI)                         | NR                               |
| Kosmider et al. <sup>2011</sup>      | Retrospective cohort | 19               | 19                | 62 (44-75)         | 5FU/LV or FOLFOX                       | Unresectable. Pts on first-line chemotherapy         | Limited pulmonary nodules or abdominal lymphadenopathy           | NR                | 0: n=10 (53%)<br>1: n=9 (47%)                | NR                            | Median 40% (25-65%) | None                                                                             | Resin            | Median 1.96 (range 1.60-2.60) | Every 2 months - 4.4 months (for liver) - 18.6 months    | Liver: 2 - 15 - 1 - 1 - 0<br>Overall: 2 - 14 - 1 - 2 - 0 | 10.4 months (95%-CI)                      | 29.4 months (95%-CI NR)          |
| Chua et al. <sup>2011</sup>          | Prospective database | 48               | 48                | NS <sup>b</sup>    | 5FU (concomitant or post-Y90)          | Unresectable, chemorefractory                        | EHD limited to one site                                          | NS <sup>b</sup>   | NS <sup>b</sup>                              | NR                            | NR                  | NS <sup>b</sup>                                                                  | Resin            | NS <sup>b</sup>               | Every 6 months - NR - NR                                 | n=25 CR or PR, n=23 SD or PD                             | NR                                        | 13 months (95%-CI NR)            |
| Hendlisz et al. <sup>2010</sup>      | RCT (phase 3)        | 21               | 21                | 62 (46 - 91)       | FU intravenous                         | Unresectable, chemorefractory                        | No EHD accepted                                                  | 0/21 (0%)         | 0: n=15 (71%)<br>1: n=5 (24%)<br>2: n=1 (5%) | NR                            | NR                  | Last regime irinotecan based: n=13<br>oxaliplatin based: n=4<br>other based: n=4 | Resin            | Median 1.79 (range 1.32-2.15) | Every 6 weeks - NR - NR                                  | 0 - 2 - 16 - 2 - 1                                       | 5.5 months (95%-CI)                       | 10.0 months (95%-CI NR)          |
| Inarrairaegui et al. <sup>2010</sup> | Retrospective cohort | 71               | 225               | NR                 | Standard chemotherapy                  | A rescue or consolidation treatment                  | EHD under control or not influencing prognosis                   | NR                | NR                                           | NR                            | NR                  | NR                                                                               | Resin            | NS for mCRC                   | Every 2-3 months - NA - NS for mCRC                      | NR                                                       | NR                                        | 12 months (8.4-15.5)             |
| Van Hazel et al. <sup>2009</sup>     | Phase 1 trial        | 25               | 25                | 59 (34-78)         | Irinotecan                             | Unresectable, chemorefractory<br>Naive to irinotecan | Liver dominant (NS)                                              | 12/25 (48%)       | 0: n=18 (72%)<br>1: n=7 (28%)                | Median ALT: 49 (22-346)       | Median 20% (5-60%)  | 1 line: n=17<br>2 lines: n=6<br>3 lines: n=2                                     | Resin            | Median 1.80 (range 0.75-2.44) | Every 3 months - NR - NR                                 | 0 - 11 - 9 - 3 - 0                                       | 6.0 months (range 1.6-11.4)               | 12.2 months (range 2.8->60)      |

|                                  |                      |     |     |                    |                                       |                                                  |                                   |              |                                                              |                                         |                                        |                                                         |       |                            |                                                |                                                                      |                                          |                                     |
|----------------------------------|----------------------|-----|-----|--------------------|---------------------------------------|--------------------------------------------------|-----------------------------------|--------------|--------------------------------------------------------------|-----------------------------------------|----------------------------------------|---------------------------------------------------------|-------|----------------------------|------------------------------------------------|----------------------------------------------------------------------|------------------------------------------|-------------------------------------|
| Stuart et al. <sup>2008</sup>    | Retrospective cohort | 13  | 30  | NS for mCRC        | Systemic therapy in 3 pts             | Chemorefractory                                  | Liver dominant (NS)               | 5/13 (38%)   | NR                                                           | NR                                      | NR                                     | NR                                                      | Resin | NS for mCRC                | Every 3 months - NR - NR                       | NS for mCRC                                                          | 112 days (=3.7 months) (95%-CI NR)       | 357 days (=11.7 months) (95%-CI NR) |
| Sharma et al. <sup>2007</sup>    | Phase 1 trial        | 20  | 20  | 59 (47-76)         | Modified FOLFOX4                      | Unresectable. Chemo-naïve for metastatic disease | Liver dominant (NS)               | 13/20 (65%)  | 0: n=18 (90%)<br>1: n=2 (10%)                                | Elevated ALT: n=6<br>Elevated AST: n=14 | <25%: n=9<br>26-50%: n=9<br>>50%: n=2  | Only adjuvant chemo, chemo-naïve for metastatic disease | Resin | Median 1.7 (range 0.9-3.1) | Every 3 months - At 12 weeks - NR              | 0 - 18 - 2 - 0 - 0                                                   | 9.3 months (range 3.9-30.7)              | NR                                  |
| Stubbs et al. <sup>2006</sup>    | NR                   | 100 | 100 | 61 (28-77)         | Intra hepatic 5-FU in 87/100 patients | Unresectable                                     | Liver dominant (NS)               | 25/100 (25%) | 0: n=50 (50%)<br>1: n=38 (38%)<br>2: n=8 (8%)<br>3: n=4 (4%) | NR                                      | <25% n=60<br>25-50% n=21<br>>50% n=19  | NR                                                      | Resin | NR                         | Every 3 months - At 3 and 6 months - 11 months | 3mo: 1 - 58 - 16 - 5 - 0<br>6mo: 2 - 39 - 10 - 14 - 0                | NR                                       | 11 months (range 0.1-76.6)          |
| Lim et al. <sup>2005</sup>       | Prospective cohort   | 32  | 46  | NS for mCRC        | 5FU (in n pts <sup>a</sup> )          | n=4 chemo-naïve, n=28 had prior chemotherapy     | Liver dominant (NS)               | 5/32 (16%)   | NR for mCRC                                                  | NR                                      | NR                                     | 0 lines: n=4<br>>0 lines: n=28                          | Resin | NR                         | Every 2 months - At 2 months - NS for mCRC     | 0 - 10 - 9 - 13 - 0                                                  | NR for entire group of mCRC <sup>c</sup> | NR                                  |
| Van Hazel et al. <sup>2004</sup> | RCT (phase 2)        | 11  | 11  | Mean 64 (range NR) | FU/LV                                 | Unresectable. Chemo-naïve for metastatic disease | Liver dominant (NS)               | 2/11 (18%)   | NR                                                           | NR                                      | <25%: n=8<br>>25%: n=3                 | NR                                                      | Resin | Median 2.1 (range 1.5-2.5) | Every 3 months - NR - NR                       | 0 - 8 - 3 - 0 - 0                                                    | 18.6 months (95%-CI)                     | 29.4 months (95%-CI NR)             |
| Gray et al. <sup>2001</sup>      | RCT (phase 3)        | 36  | 36  | Mean 59 (range NR) | Intrahepatic floxuridine              | Unresectable                                     | Only lymph nodes in porta hepatis | NR           | NR                                                           | NR                                      | <25%: n=24<br>25-50%: n=9<br>>50%: n=3 | Prior chemo for metastatic disease: n=5                 | Resin | Mean 2.2 (SD 0.3)          | Every 3 months - NR - NR                       | By area:<br>2 - 14 - 13 - 3 - 4<br>By volume:<br>2 - 16 - 10 - 5 - 3 | 15.9 months (95%-CI)                     | 17 months (95%-CI NR)               |

mCRC colorectal cancer liver metastases; RCT randomized controlled trial; NR not reported; FU/LV fluorouracil/leucovorin; EHD extrahepatic disease; NS not specified; bevac/cetux bevacizumab or cetuximab; CI confidence interval; AST aspartate transaminase, ALT alanine transaminase

<sup>a</sup> Patients who had not received prior systemic 5FU were given this together with the spheres; for other patients a concurrent bolus 5FU was given as a radiosensitizer at the investigator's discretion.

<sup>b</sup> Not specified for the group of patients treated with Y90 and chemotherapy.

<sup>c</sup> Progression-free survival in group of mCRC patients previously treated with 5FU was 8.4 months.

<sup>d</sup> Including bilirubin, AST, ALT, and albumin.

Supplemental Table 3. Critical appraisal of studies on Y90-RE for colorectal cancer liver metastases.

|                                      | No. of pts | Consecutive patients | Reported on    |                       |                |                           |                  |                  |                    | EHD included in response assessment | Loss to follow-up | Subsequent treatment                 |
|--------------------------------------|------------|----------------------|----------------|-----------------------|----------------|---------------------------|------------------|------------------|--------------------|-------------------------------------|-------------------|--------------------------------------|
|                                      |            |                      | Baseline EHD   | Baseline tumor burden | Baseline PS    | Previous systemic therapy | Imaging interval | Time of response | Follow-up duration |                                     |                   |                                      |
| <b>Y90-RE as monotherapy</b>         |            |                      |                |                       |                |                           |                  |                  |                    |                                     |                   |                                      |
| Beste et al. <sup>2012</sup>         | 224        | +                    | +              | +/-                   | +/-            | - <sup>a</sup>            | - <sup>b</sup>   | - <sup>b</sup>   | - <sup>b</sup>     | - <sup>b</sup>                      | NR                | NR                                   |
| Fahmueller et al. <sup>2012</sup>    | 49         | +                    | -              | -                     | -              | -                         | +                | +                | +                  | +                                   | 1/49 (2%)         | NR                                   |
| Martin et al. <sup>2012</sup>        | 24         | +                    | +              | -                     | -              | +/-                       | -                | -                | -                  | +                                   | NR                | NR                                   |
| Tochetto et al. <sup>2012</sup>      | 20         | -                    | -              | -                     | -              | -                         | +                | +                | -                  | NR                                  | 0/20 (0%)         | NR                                   |
| Seidensticker et al. <sup>2011</sup> | 29         | +                    | +              | +                     | -              | +                         | +                | -                | -                  | NR                                  | 1/29 (3%)         | n=9 further chemo                    |
| Cosimelli et al. <sup>2010</sup>     | 50         | NR                   | +              | +                     | +              | +                         | +                | +                | +                  | +                                   | 2/50 (4%)         | n=14 further chemo                   |
| Cianni et al. <sup>2009</sup>        | 41         | NR                   | +              | +                     | +/-            | +/-                       | +                | +                | -                  | NR                                  | NR                | n = 31 re-Y90-RE                     |
| Hong et al. <sup>2009</sup>          | 15         | NR                   | +              | -                     | -              | -                         | +                | -                | +                  | - <sup>b</sup>                      | NR                | NR                                   |
| Mulcahy et al. <sup>2009</sup>       | 72         | NR                   | +              | +                     | +              | +                         | +                | -                | -                  | NR                                  | NR                | NR                                   |
| Jakobs et al. <sup>2008</sup>        | 41         | +                    | +              | -                     | -              | +/-                       | +                | -                | +                  | +                                   | 2/41 (5%)         | NR                                   |
| Sato et al. <sup>2008</sup>          | 51         | NR                   | -              | -                     | +              | - <sup>a</sup>            | +                | - <sup>b</sup>   | +                  | -                                   | NR                | NR                                   |
| Kennedy et al. <sup>2006</sup>       | 208        | NR                   | -              | -                     | -              | +                         | -                | +                | -                  | NR                                  | NR                | NR                                   |
| Lewandowski et al. <sup>2005</sup>   | 27         | NR                   | +              | +                     | +              | +/-                       | +                | +                | +                  | -                                   | 1/27 (4%)         | NR                                   |
| <b>Y90-RE with chemotherapy</b>      |            |                      |                |                       |                |                           |                  |                  |                    |                                     |                   |                                      |
| Nace et al. <sup>2011</sup>          | 51         | +                    | -              | -                     | -              | +                         | +                | +                | +                  | -                                   | 20/51 (39%)       | n = 27 re-Y90-RE                     |
| Zerizer et al. <sup>2012</sup>       | 25         | NR                   | +              | -                     | -              | +/-                       | +                | +                | -                  | -                                   | 1/25 (4%)         | n = 2 surgery                        |
| Kosmider et al. <sup>2011</sup>      | 19         | +                    | -              | +/-                   | +              | +                         | +                | +                | +                  | +                                   | NR                | NR                                   |
| Chua et al. <sup>2011</sup>          | 48         | +                    | - <sup>a</sup> | -                     | - <sup>a</sup> | - <sup>a</sup>            | +                | -                | -                  | +                                   | NR                | NR                                   |
| Hendlisz et al. <sup>2010</sup>      | 21         | NR                   | +              | -                     | +              | +/-                       | +                | -                | -                  | -                                   | 1/21 (5%)         | n = 7 systemic<br>n = 2 locoregional |
| Inarrairaegui et al. <sup>2010</sup> | 71         | +                    | -              | -                     | -              | -                         | +                | -                | - <sup>a</sup>     | - <sup>b</sup>                      | NR <sup>a</sup>   | NR                                   |
| Van Hazel et al. <sup>2009</sup>     | 25         | -                    | +              | +/-                   | +              | +                         | +                | -                | -                  | NR                                  | 2/25 (8%)         | n = 1 RFA                            |

|                                  |     |    |   |   |                |     |   |   |                |    |                 |                 |
|----------------------------------|-----|----|---|---|----------------|-----|---|---|----------------|----|-----------------|-----------------|
| Stuart et al. <sup>2008</sup>    | 13  | +  | + | - | -              | -   | + | - | -              | +  | 0/13<br>(0%)    | NR <sup>a</sup> |
| Sharma et al. <sup>2007</sup>    | 20  | NR | + | + | +              | +   | + | + | -              | NR | NR              | n = 2 surgery   |
| Stubbs et al. <sup>2006</sup>    | 100 | +  | + | + | +              | -   | + | + | +              | -  | 20/100<br>(20%) | NR              |
| Lim et al. <sup>2005</sup>       | 32  | NR | + | - | - <sup>a</sup> | +/- | + | + | - <sup>a</sup> | -  | 1/32<br>(3%)    | n = 1 surgery   |
| Van Hazel et al. <sup>2004</sup> | 11  | NR | + | + | -              | -   | + | - | -              | NR | 0/11<br>(0%)    | NR              |
| Gray et al. <sup>2001</sup>      | 36  | NR | + | + | -              | +/- | + | - | -              | -  | 4/36<br>(11%)   | NR              |

*+ Yes, +/- Incomplete, - No, NR not reported; EHD extrahepatic disease, PS performance score, NA not applicable, RFA radio frequency ablation*

*a Not specified for patients with colorectal cancer liver metastases.*

*b Tumor response not a study endpoint.*
